# Supplementary material for: Highly Conserved Homotrimer Cavity Formed by the SARS-CoV-2 Spike Glycoprotein: A Novel Binding Site
Source: Preprints.org preprint supplement (doi:10.20944/preprints202004.0439.v1), 2020-04-24
Supplement: Supplementary file 1 [file supplementary]

# Highly conserved homotrimer cavity formed by the SARS-CoV-2 spike glycoprotein: a novel binding site

Umesh Kalathiya<sup>\*1</sup>, Monikaben Padariya<sup>1</sup>, Marcos Mayordomo<sup>1</sup>, Małgorzata Lisowska<sup>1</sup>, Judith Nicholson<sup>2</sup>, Ashita Singh<sup>1</sup>, Maciej Baginski<sup>3</sup>, Robin Fahraeus<sup>1</sup>, Neil Carragher<sup>4</sup>, Kathryn Ball<sup>4</sup>, Juergen Hass<sup>5</sup>, Alison Daniels<sup>5</sup>, Ted R. Hupp<sup>\*1,4</sup>, Javier Antonio Alfaro<sup>\*1,4</sup>

<sup>1</sup> International Centre for Cancer Vaccine Science, University of Gdansk, Wita Stwosza 63, 80-308 Gdansk, Poland

<sup>2</sup> Sharp Life Science (EU) Limited, Oxford Science Park, Edmund Halley Rd, Oxford OX4 4GB, England, United Kingdom

<sup>3</sup> Department of Pharmaceutical Technology and Biochemistry, Faculty of Chemistry, Gdansk University of Technology, Narutowicza St 11/12, 80-233, Gdansk, Poland

<sup>4</sup> Institute of Genetics and Molecular Medicine, University of Edinburgh, Edinburgh, Scotland EH4 2XR, United Kingdom

<sup>5</sup> Department of Infectious Disease, Edinburgh, Scotland EH4 2XR, United Kingdom

\* Correspondence: umesh.kalathiya@ug.edu.pl (U.K), ted.hupp@ed.ac.uk (T.R.H.), javier.alfaro@proteogenomics.ca (J.A. A.)

## SUPPORTING MATERIALS

## Molecular dynamics simulations methods

The missing residues inserted in the structure for the SARS-CoV-2 spike (S) glycoprotein (e.g. chain A) as per Figure 1 (in main text) were: residue range 67-78 (AIHVSGTNGTKR), 96-98 (EKS), 143-155 (VYYHKNNKSWMES), 177-186 (MDLEGKQGNF), 247-260 (SYLTPGDSSSGWTA), 329-334 (FPNITN), 444-448 (KVGGN), 455-490 (LFRKSNLKPFERDISTEIQAGSTPCNGVEGFNCYF), 501-502 (NG), 621-639 (PVAIHADQLTPTWRVYSTG), 673-686 (SYQTQTNSPGSASS), 812-814 (PSK), and 829-852 (ADAGFIKQYGDCLGDIAARDLICA).

The molecular dynamics simulations in the current work were performed using GROMACS 4.6.5 [1, 2] applying the CHARMM27 forcefield. For both monomer and homotrimer systems of S protein, the PBC (periodic boundary conditions) were applied in all directions, and the simulation box was filled with water molecules or models applying simple point charge (SPC) parameters. In addition, to neutralize the simulation box, the Na<sup>+</sup>Cl<sup>-</sup> counter ions were added. Subsequently, the energy minimization of the model systems was performed (20000 steps) using the steepest-descent algorithm until the systems reached its minimum energy. These minimized systems were then equilibrated to adjust water molecules with Na<sup>+</sup>Cl<sup>-</sup> counter ions for 1000 ps using a constant number of particles, pressure, and temperature (NPT; isobaric-isothermal ensemble). The particle mesh ewald (PME) method was used for long range electrostatics. Moreover, for the van der Waals and Coulomb interactions a cutoff of 10 Å was applied. In order to restrain the bond lengths between the heavy atom and nonpolar hydrogen atoms, the LINear Constraint Solver constraints were applied [3, 4]. The velocity-rescaling thermostat [5] was used to preserve a constant temperature (300 K). The Parrinello-Rahman barostat [6, 7] was applied to maintain constant pressure at 1.0 bar for the simulated systems. On the equilibrated systems, using the leapfrog integrator, the production run was performed for 100 ns for the monomeric and trimeric S proteins. Furthermore, using the tools from GROMACS [1, 2], BIOVIA Discovery Studio [Dassault Systemes, BIOVIA Corp., San Diego, CA, USA], and visual molecular dynamics (VMD) tools [8] the trajectories obtained as output from the MD simulation production were analysed. Furthermore, the Chimera [9] package was used to generate movies for the coordinates obtained from molecular dynamics simulations.

## Supporting analyzing for the figures from the main text

**Figure 2 in the main text.** The most common amino acid substitutions, the position in the chain (the RBD domain and S2 subunit), and the comparison to the consensus sequence obtained from the alignment are: H49Y Q239K, V367F, V483A, S943P, K986P, and V987P (Figure 2 and Table S1, S2, S3, and S4).

Following previous studies that have explored sequence variability in the 2019-nCoV spike protein [10], it was confirmed that some of the first reported substitutions are high variability regions and common mutations. The phenylalanine substitution in position 32 exhibited a change not only to isoleucine, but also to serine. Other substitutions previously detected like H49Y, S247R and V367F increase as a function of the total number of clinical isolates detected. The D614G substitution is of special interest as it has been detected in 30% of the GISAID strains (261 cases of the 791

total), consolidating this gene mutation that was previously reported once among 61 clinical isolates [10].

**Table S1** (*attached as an excel file*). Variability in the SARS-CoV-19 S protein for the entire sequence. The amino acid substitutions in each position across 791 SARS-CoV-2 strains from the GISAID database.

**Table S2** (*attached as an excel file*). The receptor binding domain (RBD domain) variability of the SARS-CoV-19 S protein. The amino acid substitutions in each position across 791 SARS-CoV-2 strains from the GISAID database.

**Table S3** (*attached as an excel file*). S2 subunit sequence variability (residue range; 816-1141; HR1, CH and CD domains) in the SARS-CoV-19 S protein. The amino acid substitutions in each position across 791 SARS-CoV-2 strains from the GISAID database.

**Table S4:** The most common amino acid substitutions, the position in the chain i.e., RBD domain and S2 subunit (HR1, CH and CD domains), with comparison to the consensus sequence obtained from the alignment.

| Domain     | Position | aa change | Consensus | Times detected |
|------------|----------|-----------|-----------|----------------|
| N-Ter      | 49       | Tyr       | His       | 6              |
|            | 239      | Lys       | Gln       | 6              |
| RBD        | 367      | Phe       | Val       | 6              |
|            | 483      | Ala       | Val       | 3              |
| S2 subunit | 943      | Pro       | Ser       | 6              |
|            | 986      | Pro       | Lys       | 3              |
|            | 987      | Pro       | Val       | 3              |

**Figure 3 in the main text.** The findings from RMSD for both systems suggests that the homotrimer form of S protein is more stable compared to the monomer, since the monomeric protein has higher RMSD values (~10-25 Å) compared to all three chains (Figure 1a) in the trimer (~3-5 Å; Figure 3a). The monomer S protein model exhibited stable RMSDs after 75 ns, while the trimer showed stability throughout the MD simulations. Particularly, in the homotrimer system, the chain A obtains higher RMSD of about ~2 Å compared to other two chains (chain B and C), and the chain A is suggested to be in 'up' conformation [PDB ID: 6vsb] [10] that is involved in the interactions with host cell receptor ACE2.

**The intermolecular H-bond interactions between chains of homotrimer.** The hydrogen bond (H-bond) interactions between three chains (A-B, A-C, and B-C) of the homotrimer S protein were traced during the MD simulations (Figure S1 and Table S5). These intermolecular interactions may facilitate the S protein from SARS-CoV-2 to exist in the 'down' to 'up' or 'up' to down' conformation of the RBD domain to fuse with the host cell membrane. The H-bonds were computed keeping the donor-acceptor distance cutoff  $\leq 3.5$  Å and donor-H-acceptor angle cutoff  $\geq 160^\circ$ – $180^\circ$ . The H-bond plots (Figure S1) explain that the pair chain A-chain C have a higher number (~25 H-bonds) of intermolecular interactions compared to the other two chain pairs (~15-20 H-bonds; chain A-chain B and chain B-chain C). Tracing residues involved in the interactions between chain A and chain B of the homotrimer, suggest that the RBD domain residues are involved in interactions with each other with high occupancy (%) (Table S5).

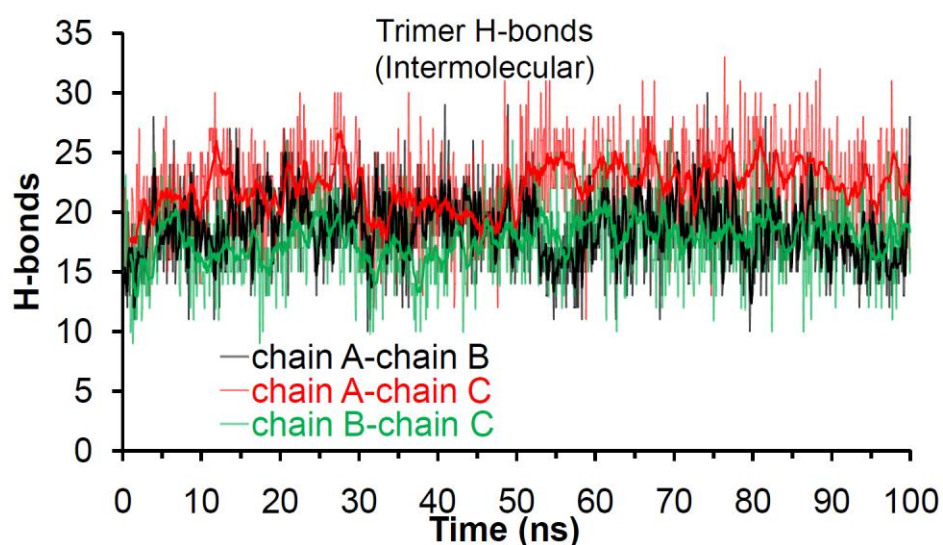

**Figure S1.** The intermolecular H-bond interactions formed between three chains (A-B, A-C, and B-C) of the homotrimer S protein, traced during the MD simulations.

**Table S5.** The hydrogen bond (H-bond) interactions between three chains (A-B, A-C, and B-C) of the trimer S protein were traced during the MD simulations. The interaction pairs with donor or acceptor are mentioned, and residues showing occupancy (%)  $\geq 10$  % are considered.

| chain A-chain B |          |        | chain A-chain C |          |        | chain B-chain C |          |        |
|-----------------|----------|--------|-----------------|----------|--------|-----------------|----------|--------|
| Donor           | Acceptor | Occup% | Donor           | Acceptor | Occup% | Donor           | Acceptor | Occup% |
| Arg319          | Asp737   | 93.81  | Arg319          | Asp737   | 88.92  | Arg995          | Asp994   | 73.75  |
| Arg319          | Asp745   | 89.22  | Phe43           | Phe565   | 76.55  | Phe43           | Phe565   | 68.36  |
| Phe43           | Phe565   | 74.85  | Phe898          | Tyr707   | 70.66  | Phe898          | Tyr707   | 64.67  |
| Arg995          | Asp994   | 70.66  | Tyr200          | Glu516   | 69.66  | Ser383          | Asp985   | 58.78  |
| Thr547          | Asp979   | 64.37  | Arg1091         | Asp1118  | 66.77  | Arg319          | Asp745   | 57.29  |
| Phe898          | Tyr707   | 61.68  | Arg319          | Asp745   | 66.37  | Ala668          | Pro863   | 56.89  |
| Arg1039         | Glu1031  | 59.78  | Arg995          | Asp994   | 62.67  | Lys790          | Asn703   | 52.50  |
| Ala668          | Pro863   | 58.38  | Arg646          | Asp848   | 60.58  | Arg646          | Asp839   | 49.10  |
| Ser967          | Ala570   | 55.99  | Arg847          | Glu619   | 59.68  | Ile788          | Ala701   | 48.90  |
| Ser758          | Gln965   | 51.10  | Ser967          | Ala570   | 55.29  | Asn703          | Ile788   | 48.10  |
| Asn703          | Ile788   | 49.50  | Lys964          | Asp571   | 54.09  | Lys854          | Asp614   | 45.81  |
| Ile788          | Ala701   | 49.10  | Arg1039         | Glu1031  | 52.50  | Arg1039         | Glu1031  | 44.11  |
| Arg646          | Asp848   | 48.90  | Ala713          | Gln895   | 52.20  | Arg646          | Glu868   | 43.41  |
| Lys854          | Asp614   | 48.60  | Ser383          | Asp985   | 51.70  | Arg567          | Phe43    | 37.03  |
| Ser968          | Tyr756   | 44.51  | Thr859          | Asp614   | 49.80  | Lys790          | Glu702   | 36.33  |
| Gln564          | Lys41    | 44.41  | Lys790          | Asn703   | 49.00  | Arg847          | Asp614   | 34.13  |
| Lys790          | Asn703   | 41.72  | Ser968          | Tyr756   | 48.60  | Arg1091         | Asp1118  | 31.54  |
| Arg1091         | Asp1118  | 40.52  | Arg567          | Phe43    | 47.50  | Gln1005         | Gln1002  | 30.34  |
| Lys790          | Glu702   | 40.12  | Gln564          | Lys41    | 45.71  | Arg408          | Asp405   | 28.94  |
| Arg1019         | Glu1017  | 38.32  | Lys854          | Asp614   | 45.21  | Ala713          | Gln895   | 26.75  |
| Ala713          | Gln895   | 34.83  | Thr547          | Asp979   | 45.11  | Arg995          | Gln755   | 26.15  |
| Gln895          | Asn1074  | 34.23  | Lys790          | Glu702   | 42.71  | Ser967          | Asp571   | 25.25  |
| Tyr707          | Asp796   | 33.93  | Lys458          | Asp389   | 41.92  | Gln115          | Arg466   | 22.46  |
| Arg567          | Phe43    | 31.64  | Ala668          | Pro863   | 33.73  | Lys386          | Asp985   | 22.06  |
| Asn317          | Asp737   | 31.54  | Ser758          | Gln965   | 32.44  | Tyr200          | Glu516   | 21.86  |
| Arg357          | Glu169   | 28.54  | Asn703          | Ile788   | 29.84  | Asn234          | Glu465   | 21.26  |
| Lys964          | Asp571   | 28.34  | Asn709          | Asp796   | 29.74  | Lys854          | Phe592   | 20.86  |
| Gly669          | Leu864   | 27.84  | Ile788          | Ala701   | 27.74  | Tyr421          | Asn370   | 20.26  |
| Arg646          | Asp867   | 19.76  | Ala372          | Asn481   | 27.54  | Arg1091         | Glu1092  | 19.66  |
| Phe565          | Lys41    | 18.66  | Asn487          | Ser371   | 26.85  | Arg1019         | Glu1017  | 17.27  |
| Thr961          | Gln762   | 13.17  | Gly669          | Leu864   | 26.35  | Thr415          | Asp985   | 16.27  |
| Val705          | Lys790   | 11.78  | Tyr489          | Leu368   | 24.65  | Gln965          | Gln755   | 15.97  |
| Gln965          | Tyr756   | 11.68  | Ser383          | Arg983   | 24.25  | Val705          | Lys790   | 15.87  |
| Gln563          | Asp40    | 11.38  | Phe565          | Lys41    | 21.26  | Gln506          | Asn501   | 14.67  |
|                 |          |        | Asn394          | Tyr200   | 20.46  | Ser968          | Gln755   | 14.57  |
|                 |          |        | Gln895          | Ala706   | 17.96  | Asn616          | Asp843   | 14.27  |
|                 |          |        | Lys386          | Asp985   | 15.47  | Tyr369          | Asp420   | 14.17  |
|                 |          |        | Gln784          | Asp1041  | 15.07  | Lys113          | Glu471   | 13.37  |
|                 |          |        | Lys202          | His519   | 12.97  | Gly669          | Leu864   | 11.98  |
|                 |          |        | Thr478          | Asn370   | 11.98  | Gln965          | Ser758   | 10.58  |
|                 |          |        | Gly593          | Asp737   | 11.18  |                 |          |        |
|                 |          |        | Lys386          | Leu984   | 10.98  |                 |          |        |

**Figure 4 in the main text.** Findings from our genomics analysis of the virus, as well as our analysis from MD simulations of the spike protein, indicate that a conserved region with significant mechanistic importance may be a trimer cavity or pocket formed by the S2 subunit (HR1, CH and CD domains) in the S protein. Therefore, we investigated the targetability of this region or the trimer pocket using the MOE (Chemical Computing Group Inc.), before using it for high-throughput virtual screening (or SBVS) using a library of FDA-approved drugs. The 'Alpha Shapes' construction [11, 12] geometric method was used to compute the possible residues that can be considered for ligand docking from this trimer cavity in the S protein (Figure 4a; in main text). This method classifies the alpha spheres as either "hydrophobic" or "hydrophilic (for lone pair active; LPA)" depending on whether the sphere is in a good hydrogen bonding spot in the receptor. The 'Alpha Shapes' method identified the largest cluster or active sites residues from each chain A, B, and C of trimer S protein were: W886, Y904, N907, G908, I909, G910, V911, T912, Q913, N914, E1031, G1035, Q1036, S1037, K1038, R1039, V1040, D1041, G1046, Y1047, H1048, K1086, H1088, P1090, R1091, E1092, G1093, V1094, Q1106, R1107, N1108, E1111, Q1113, T1117, D1118, N1119, T1120, F1121, V1122, S1123, G1124, D1139, P1140, L1141, and E1144 (Figure 4a).

### Movie attached as separate files

**Movie S1.** The conformation dynamics of the monomeric form of the S protein. This movie is generated using Chimera [9], taking into consideration the S protein coordinates from 1 ns and 100 ns of the molecular dynamics simulations.

**Movie S2.** The conformation dynamics of homotrimer S protein observed during the MD simulations, by focusing on the homotrimer cavity. This movie is generated using Chimera [9], taking into consideration S protein coordinates from 1 ns and the average structure created using the entire MD simulations (1-100 ns).

### Supporting references

- [1] Pronk, S., Páll, S., Schulz, R., Larsson, P., Bjelkmar, P., Apostolov, R., Shirts, M.R., Smith, J.C., Kasson, P.M., van der Spoel, D. et al. (2013). GROMACS 4.5: a high-throughput and highly parallel open source molecular simulation toolkit. *Bioinformatics* (Oxford, England), 29(7), 845–854. <https://doi.org/10.1093/bioinformatics/btt055>
- [2] Berendsen, H., Spoel, D. V. D., & Drunen, R. V. (1995). GROMACS: A message-passing parallel molecular dynamics implementation. *Computer Physics Communications*, 91(1-3), 43–56. doi: 10.1016/0010-4655(95)00042-e
- [3] Darden, T., York, D., and Pedersen, L. (1993). Particle mesh Ewald: AnN-log(N) method for Ewald sums in large systems. *The Journal of Chemical Physics*, 98(12), 10089–10092. doi: 10.1063/1.464397
- [4] Hess, B., Bekker, H., Berendsen, H. J. C., and Fraaije, J. G. E. M. (1997). LINCS: A linear constraint solver for molecular simulations. *Journal of Computational Chemistry*, 18(12), 1463–1472. doi: 10.1002/(sici)1096-987x(199709)18:12<1463::aid-jcc4>3.0.co;2-h
- [5] Bussi, G., Donadio, D., and Parrinello, M. (2007). Canonical sampling through velocity rescaling. *The Journal of Chemical Physics*, 126(1), 014101. doi: 10.1063/1.2408420
- [6] Parrinello, M., and Rahman, A. (1981). Polymorphic transitions in single crystals: A new molecular dynamics method. *Journal of Applied Physics*, 52(12), 7182–7190. doi: 10.1063/1.328693

- [7] Gunsteren, W.F.V., and Berendsen, H.J.C. (1988). A Leap-frog Algorithm for Stochastic Dynamics. *Molecular Simulation*, 1(3), 173–185. doi: 10.1080/08927028808080941
- [8] Humphrey, W., Dalke, A., and Schulten, K. (1996). VMD: Visual molecular dynamics. *Journal of Molecular Graphics*, 14(1), 33–38. doi: 10.1016/0263-7855(96)00018-5
- [9] Pettersen, E.F., Goddard, T.D., Huang, C.C., Couch, G.S., Greenblatt, D.M., Meng, E.C., and Ferrin, T.E. (2004). UCSF Chimera--A visualization system for exploratory research and analysis. *Journal of Computational Chemistry*, 25(13), 1605–1612. doi: 10.1002/jcc.20084
- [10] Wrapp, D., Wang, N., Corbett, K.S., Goldsmith, J.A., Hsieh, C.L., Abiona, O., Graham, B.S., and McLellan, J.S. (2020) Cryo-EM structure of the 2019-nCoV spike in the prefusion conformation. *Science*. 367(6483), 1260-1263. doi: 10.1126/science.abb2507
- [11] Molecular Operating Environment (MOE) 2011.10. Chemical Computing Group (2011) Montreal, Quebec, Canada.
- [12] Edelsbrunner, H. (1995). The union of balls and its dual shape. *Discrete & Computational Geometry*, 13(3-4), 415–440. doi: 10.1007/bf02574053
