# Supplementary material for: Highly Conserved Homotrimer Cavity Formed by the SARS-CoV-2 Spike Glycoprotein: A Novel Binding Site
Source: Preprints.org preprint supplement (doi:10.20944/preprints202004.0439.v1), 2020-04-24
Supplement: Supplementary file 2 [file supplementary]

Archive with 6 entries (6 files):
- Supporting_Material/Movie S1.mp4
- Supporting_Material/Movie S2.mp4
- Supporting_Material/Table S1.xlsx
- Supporting_Material/Table S2.xlsx
- Supporting_Material/Table S3.xlsx
- Supporting_Material/Ukalathiya_SuppMat.pdf
